# Supplementary material for: Does the concept of Clar's aromatic sextet work for dicationic forms of polycyclic aromatic hydrocarbons?—testing the model against charged systems in singlet and triplet states
Source: Royal Society of Chemistry journal article supplement (doi:10.1039/c1cp20530g), 2011-01-01
Supplement: c1cp20530g.pdf [file c1cp20530g.pdf]

# Does the concept of Clar's aromatic sextet work for dicationic forms of polycyclic aromatic hydrocarbons? – testing the model against charged systems in singlet and triplet state.

by

Justyna Dominikowska and Marcin Palusiak\*

*Department of Theoretical and Structural Chemistry  
University of Łódź, Tamka 12, 91-403 Łódź, Poland  
E-mail: marcinp@uni.lodz.pl*

|          |                                                                                                                                         |
|----------|-----------------------------------------------------------------------------------------------------------------------------------------|
| Page S2  | <b>Fig. S1.</b> Diagrams with interrelations between selected aromaticity indices – the case of neutral PAHs.                           |
| Page S5  | <b>Fig. S2.</b> Diagrams with interrelations between selected aromaticity indices – the case of all systems investigated.               |
| Page S8  | <b>Fig. S3.</b> Diagrams with interrelations between selected aromaticity indices – the case of neutral and singlet state charged PAHs. |
| Page S11 | <b>Table S1.</b> Optimized geometries of neutral PAHs at B3LYP/6-311++G(d,p) level of theory.                                           |
| Page S14 | <b>Table S2.</b> Optimized geometries of charged PAHs at B3LYP/6-311++G(d,p) level of theory.                                           |

Supplementary Information File for Physical Chemistry Chemical Physics

**Fig. S1.** Diagrams with interrelations between selected aromaticity indices – the case of neutral PAHs.

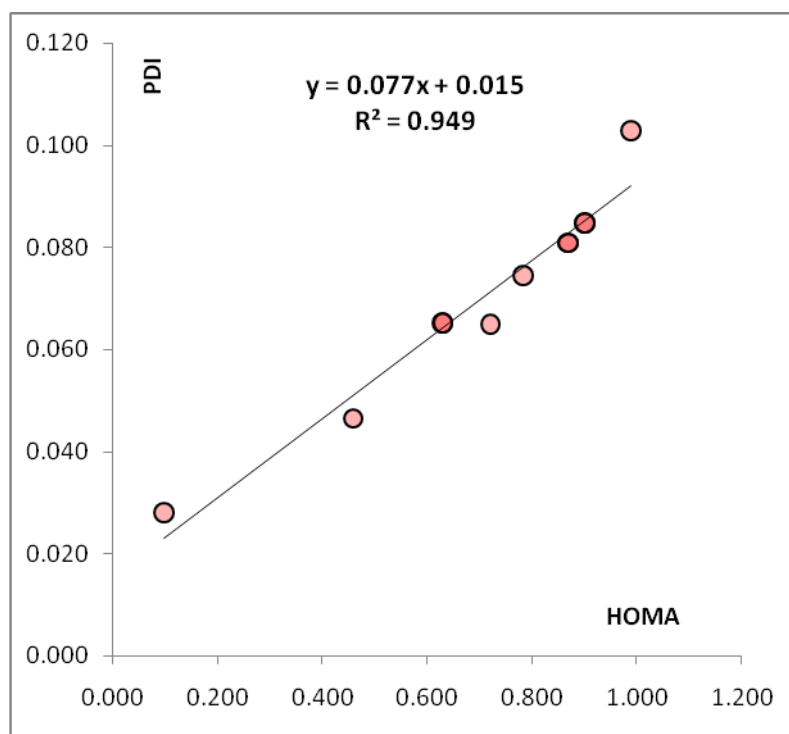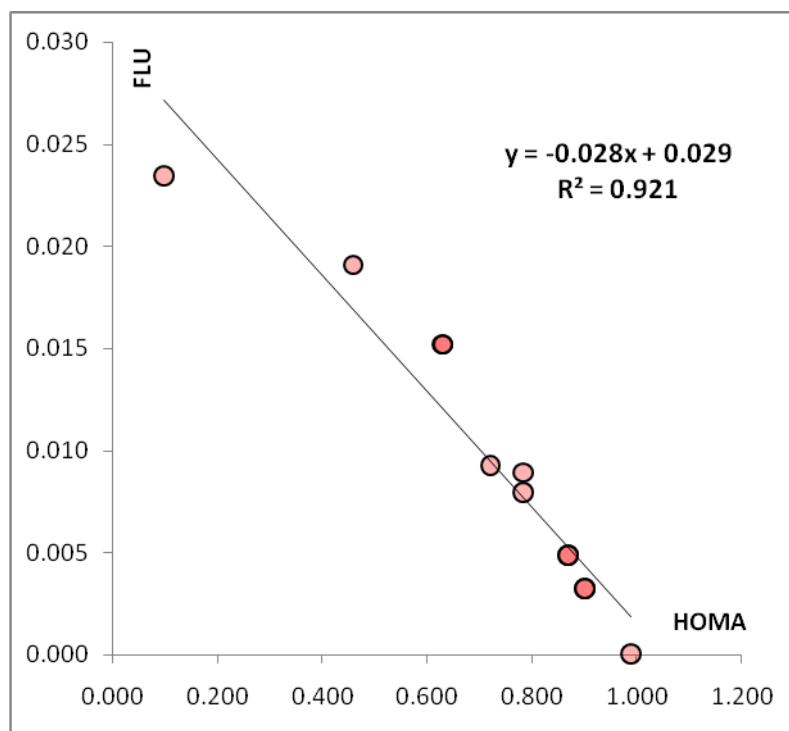

Supplementary Information File for Physical Chemistry Chemical Physics

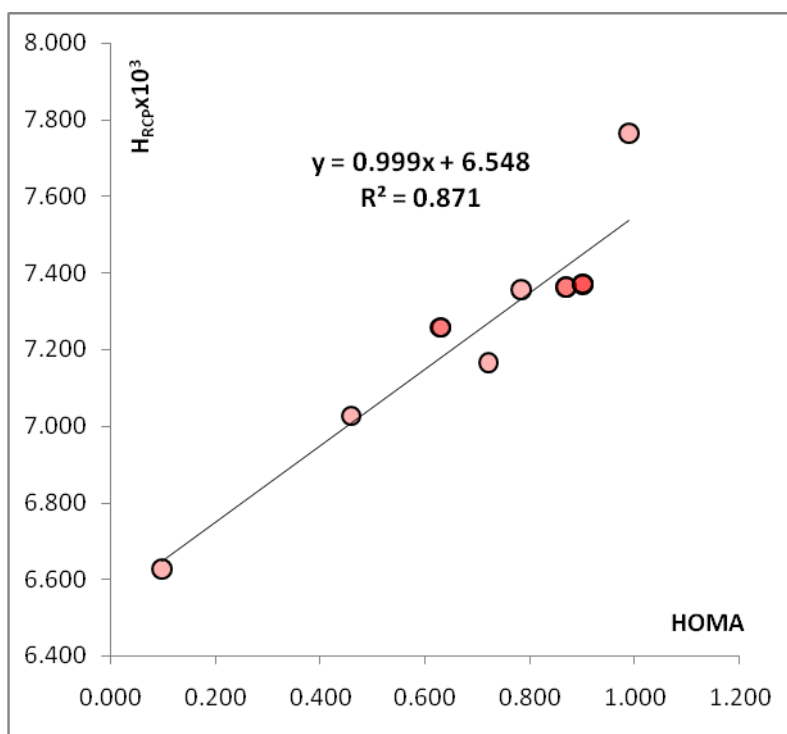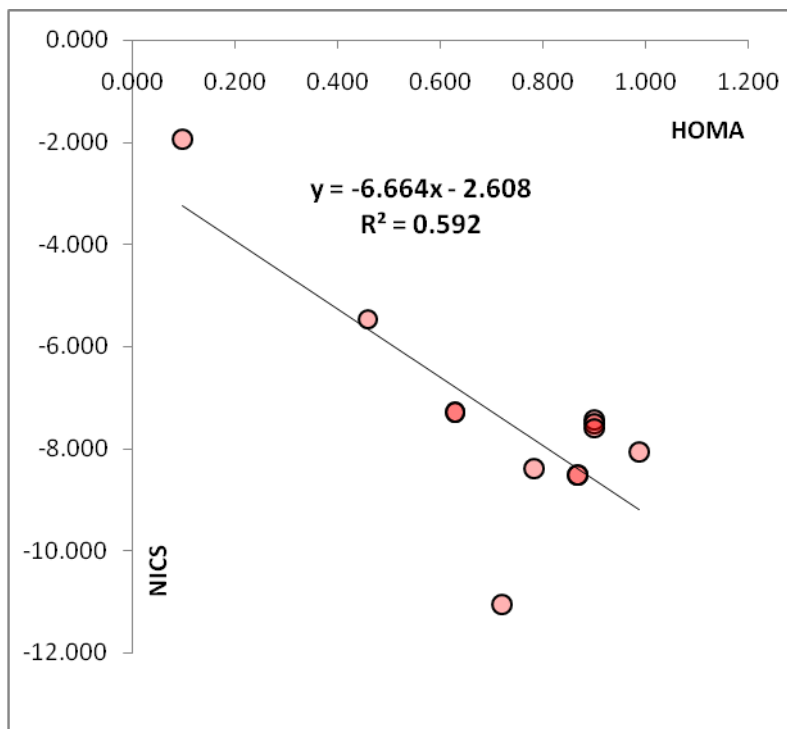

Supplementary Information File for Physical Chemistry Chemical Physics

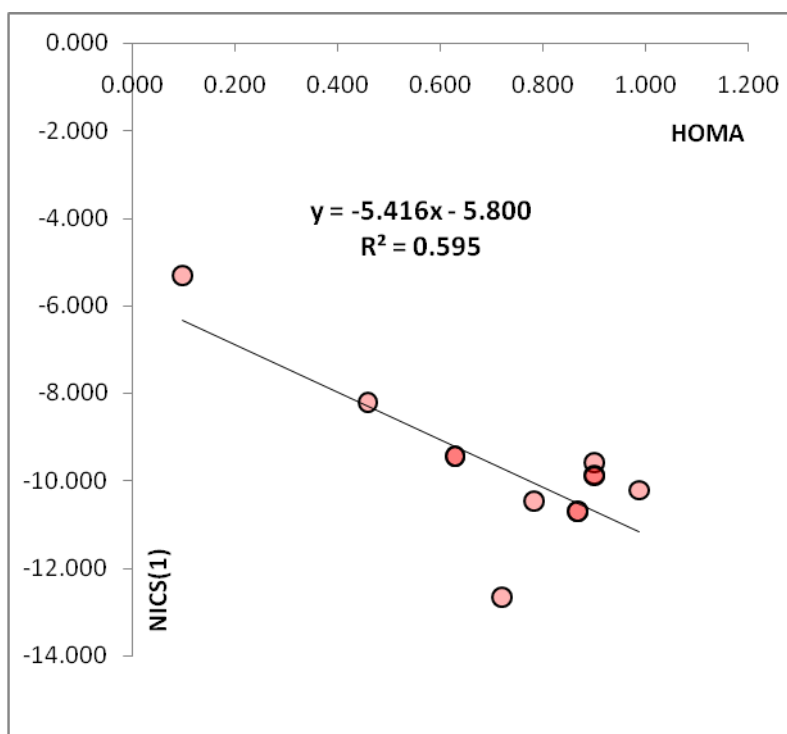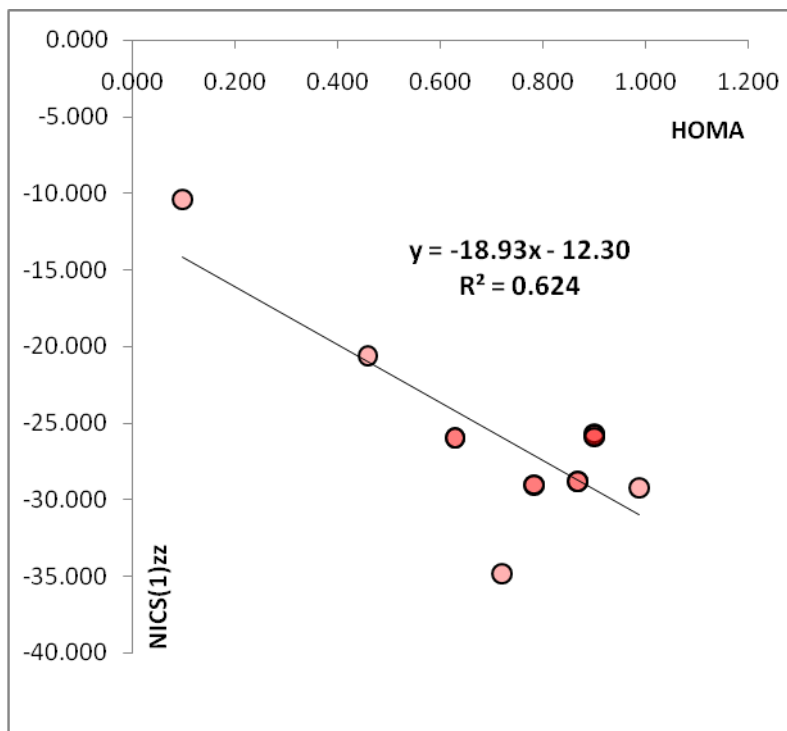

Supplementary Information File for Physical Chemistry Chemical Physics

**Fig. S2.** Diagrams with interrelations between selected aromaticity indices – the case of all systems investigated.

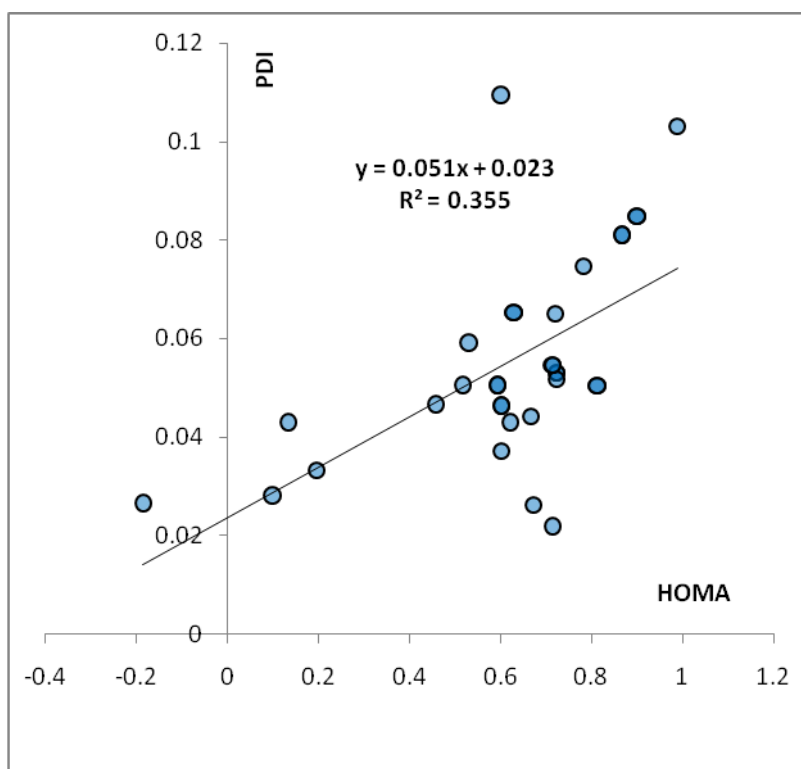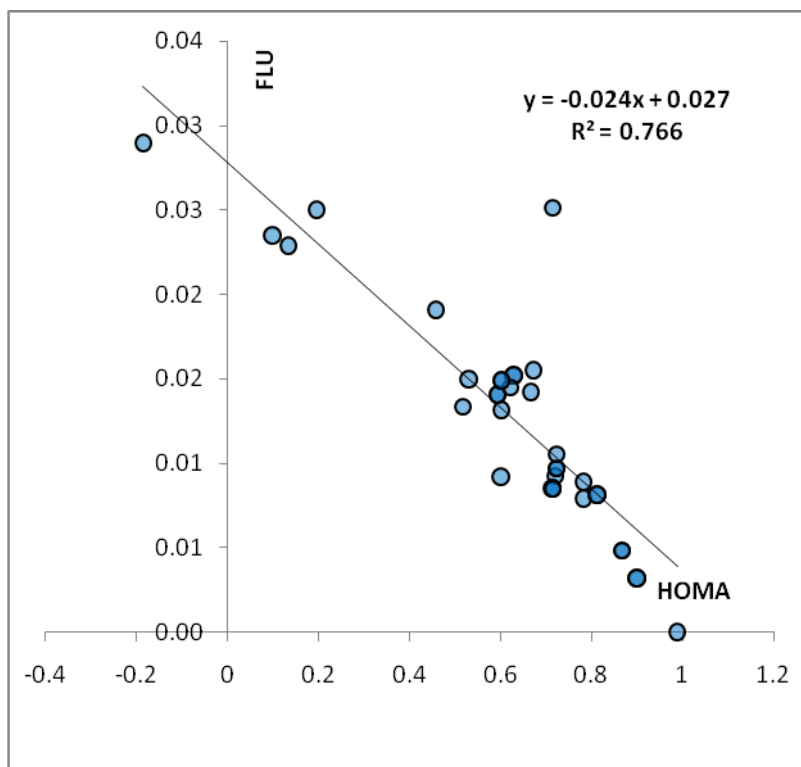

Supplementary Information File for Physical Chemistry Chemical Physics

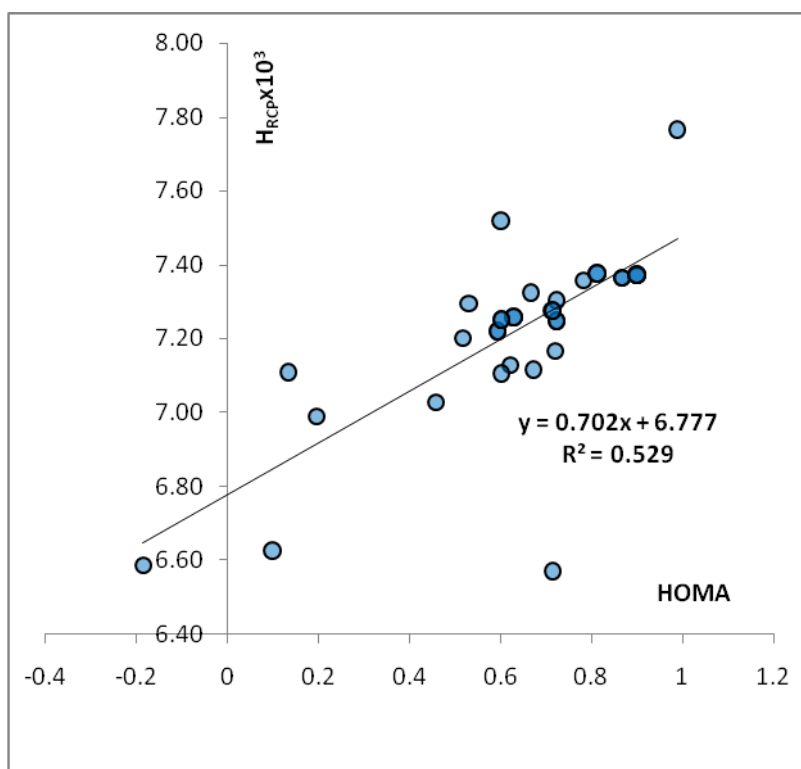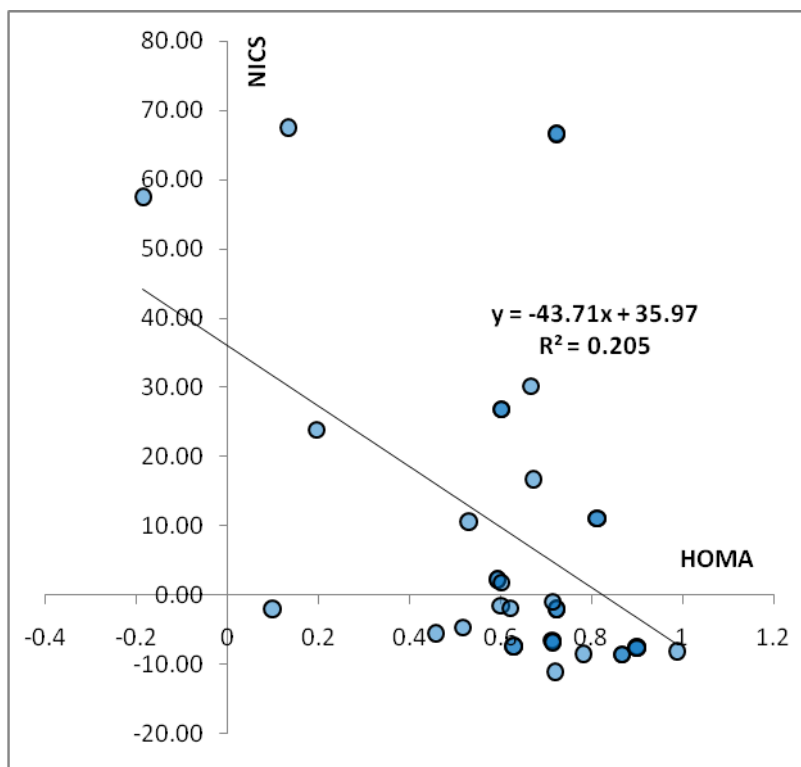

Supplementary Information File for Physical Chemistry Chemical Physics

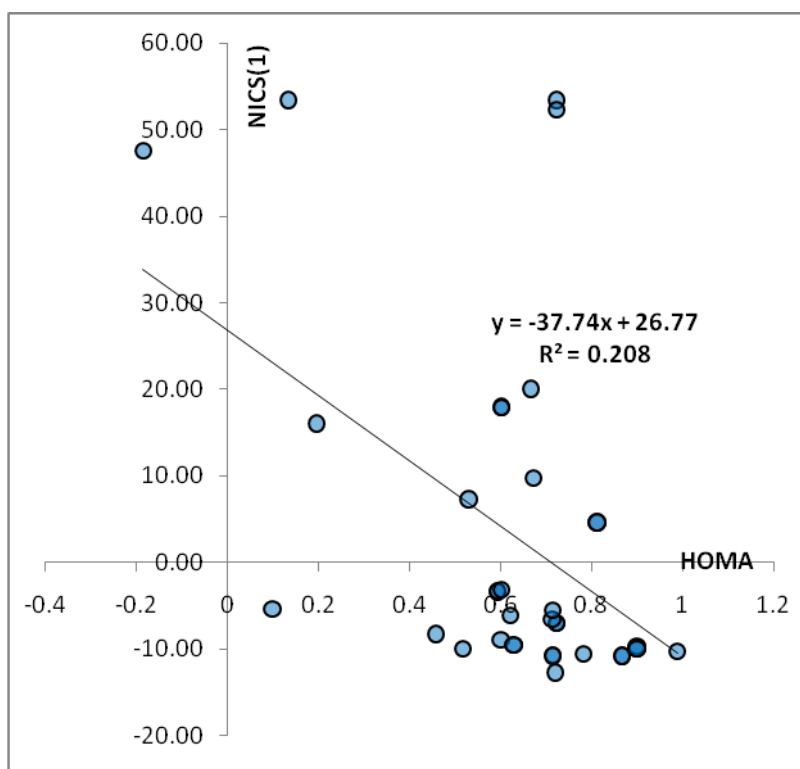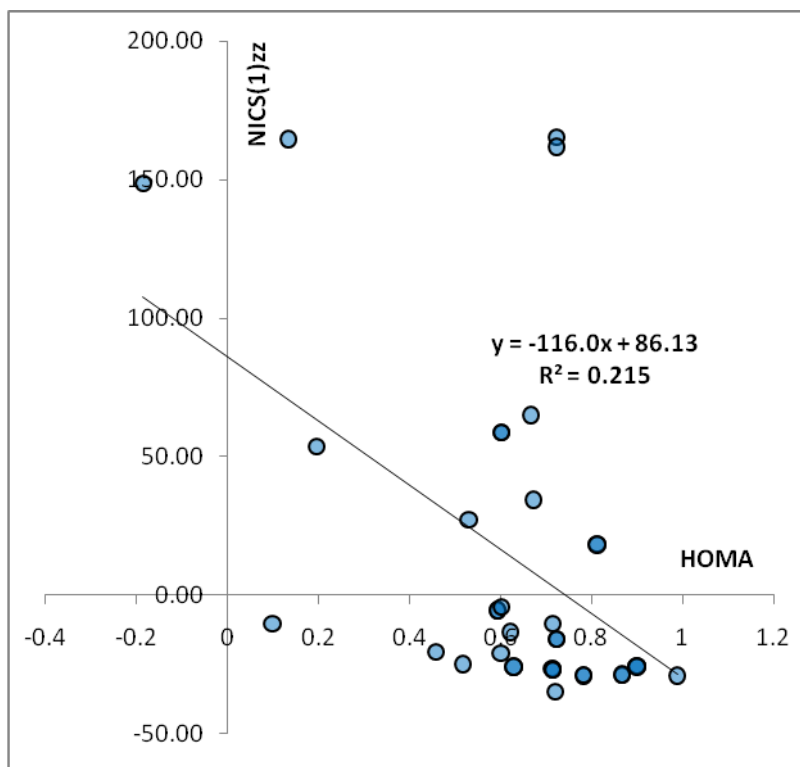

Supplementary Information File for Physical Chemistry Chemical Physics

**Fig. S3.** Diagrams with interrelations between selected aromaticity indices – the case of neutral and singlet state charged PAHs.

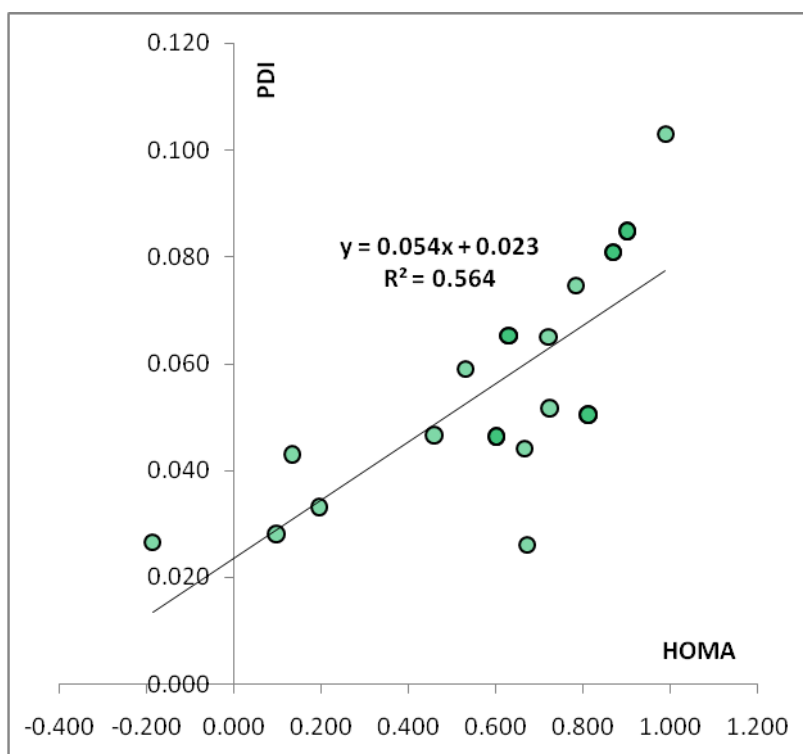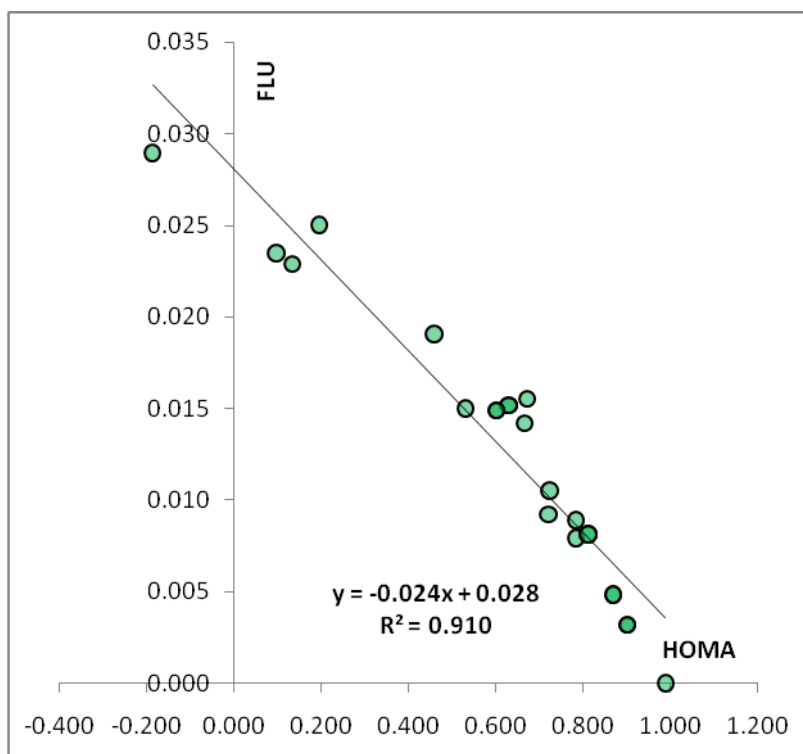



Supplementary Information File for Physical Chemistry Chemical Physics

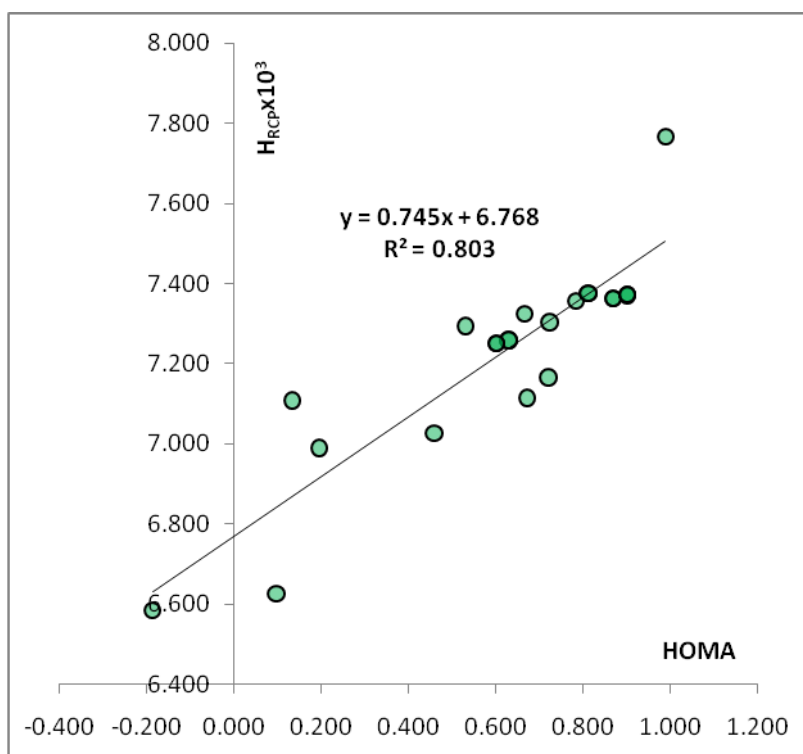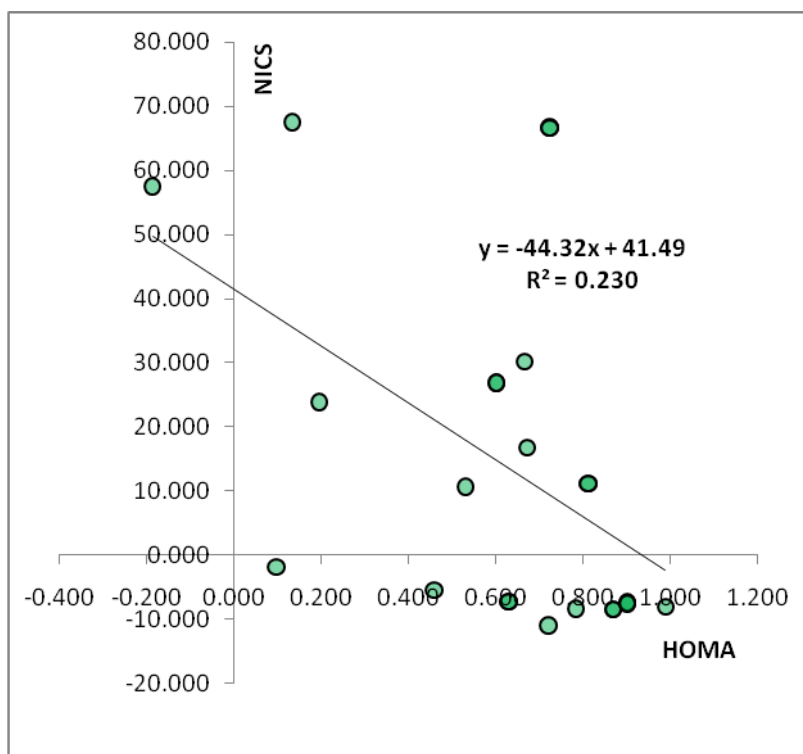

Supplementary Information File for Physical Chemistry Chemical Physics

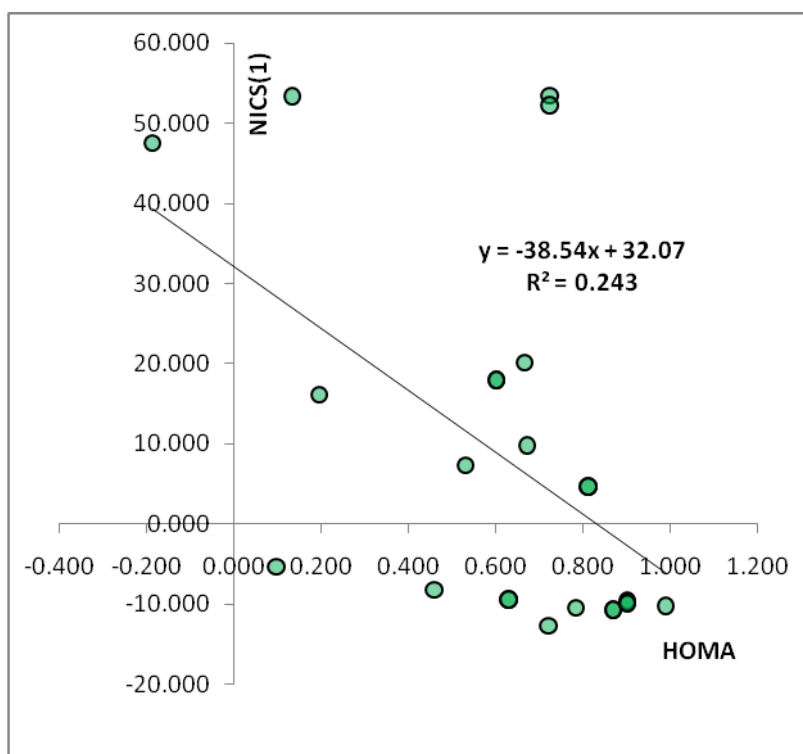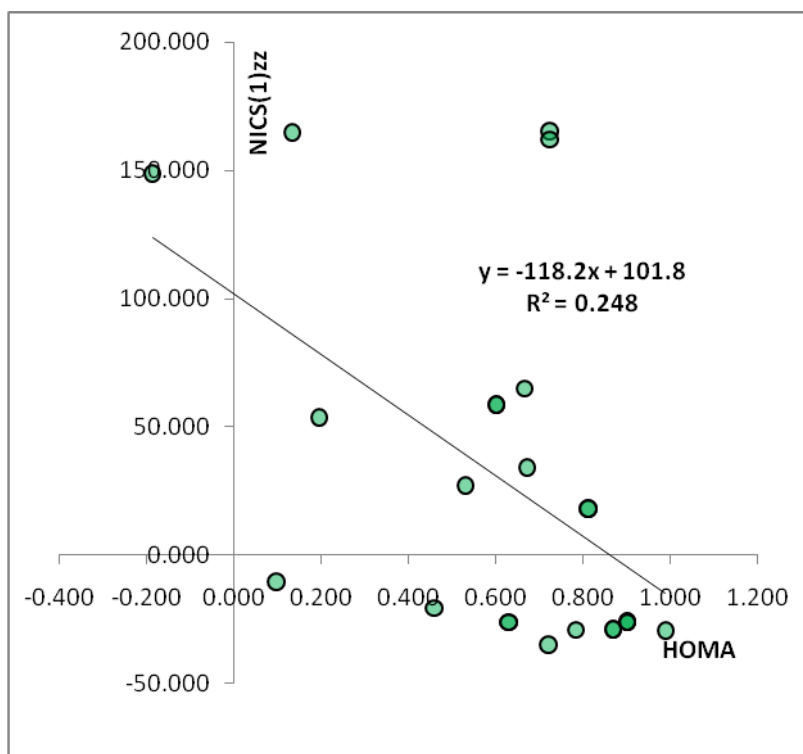

Supplementary Information File for Physical Chemistry Chemical Physics

**Table S1.** Optimized geometries of neutral PAHs at B3LYP/6-311++G(d,p) level of theory.

**Benzene**

|   |             |             |             |
|---|-------------|-------------|-------------|
| C | 1.29698700  | 0.51352500  | 0.00111200  |
| C | 1.09380300  | -0.86626000 | -0.00245000 |
| C | 0.20363400  | 1.37936900  | 0.00355900  |
| C | -0.20271800 | -1.38020600 | -0.00355800 |
| C | -1.29607000 | -0.51436200 | -0.00111100 |
| C | -1.09288600 | 0.86542400  | 0.00244800  |
| H | 0.36160600  | 2.45221200  | 0.00632700  |
| H | -0.36068700 | -2.45304900 | -0.00632500 |
| H | 2.30508800  | 0.91313100  | 0.00197300  |
| H | 1.94392200  | -1.53949700 | -0.00435200 |
| H | -1.94300600 | 1.53866000  | 0.00434900  |
| H | -2.30417200 | -0.91396600 | -0.00197100 |

**E=-232.3112981 a.u.**

**Naphtalene**

|   |             |             |             |
|---|-------------|-------------|-------------|
| C | 2.42957900  | 0.71067000  | 0.00809700  |
| C | 2.43154700  | -0.70461300 | 0.01587800  |
| C | 1.24193900  | 1.40212900  | -0.00156900 |
| C | 1.24583400  | -1.39943500 | 0.01383700  |
| C | 0.00112800  | -0.71609600 | 0.00393700  |
| C | -0.00086300 | 0.71526400  | -0.00393500 |
| C | -1.24557000 | 1.39860400  | -0.01383600 |
| H | -1.24591100 | 2.48378300  | -0.01979400 |
| C | -2.43128200 | 0.70378100  | -0.01587900 |
| C | -2.42931400 | -0.71150300 | -0.00809900 |
| C | -1.24167500 | -1.40296100 | 0.00156900  |
| H | 1.23926500  | 2.48730400  | -0.00754100 |
| H | 1.24617600  | -2.48461400 | 0.01979500  |
| H | -1.23899900 | -2.48813700 | 0.00754500  |
| H | -3.37471400 | 1.23807500  | -0.02347100 |
| H | -3.37125600 | -1.24846800 | -0.00980400 |
| H | 3.37152000  | 1.24763700  | 0.00979900  |
| H | 3.37497700  | -1.23890800 | 0.02346900  |

**E= -385.9889415 a.u.**

Supplementary Information File for Physical Chemistry Chemical Physics

**Anthracene**

|   |             |             |             |
|---|-------------|-------------|-------------|
| C | -3.65664800 | 0.71068700  | 0.00238200  |
| C | -2.47812900 | 1.40417800  | -0.00030700 |
| C | -1.22277900 | 0.72096600  | -0.00124600 |
| C | -1.22203600 | -0.72201800 | 0.00070700  |
| C | -2.47668200 | -1.40651800 | 0.00349400  |
| C | -0.00103000 | 1.40210600  | -0.00398200 |
| C | 0.00041300  | -1.40190500 | -0.00018600 |
| C | 1.22216100  | -0.72076500 | -0.00292100 |
| C | 1.22141800  | 0.72221900  | -0.00487500 |
| C | 2.47606500  | 1.40671900  | -0.00766300 |
| H | 2.47497800  | 2.49181600  | -0.00913000 |
| C | 3.65529600  | 0.71443700  | -0.00847500 |
| C | 3.65603000  | -0.71048600 | -0.00654600 |
| C | 2.47751200  | -1.40397700 | -0.00385800 |
| H | -0.00159000 | 2.48802200  | -0.00545300 |
| H | -2.47816000 | 2.48927600  | -0.00177600 |
| H | -2.47559600 | -2.49161500 | 0.00496000  |
| H | 0.00097200  | -2.48782100 | 0.00128200  |
| H | 2.47754200  | -2.48907600 | -0.00238600 |
| C | -3.65591400 | -0.71423500 | 0.00430800  |
| H | 4.59958200  | 1.24718900  | -0.01059600 |
| H | 4.60086400  | -1.24227000 | -0.00722800 |
| H | -4.60148100 | 1.24247100  | 0.00306500  |
| H | -4.60020000 | -1.24698900 | 0.00643000  |

E= -539.6603379 a.u.

**Phenanthrene**

|   |             |             |             |
|---|-------------|-------------|-------------|
| C | 3.55700000  | -0.29779600 | 0.01255400  |
| C | 2.83462600  | 0.87627800  | 0.01358000  |
| C | 1.42134600  | 0.86388900  | 0.00820900  |
| C | 0.72837800  | -0.38067600 | 0.00162200  |
| C | 1.49818900  | -1.56592900 | 0.00073900  |
| C | 2.87867400  | -1.52905900 | 0.00606200  |
| C | 0.67860900  | 2.09076400  | 0.00932200  |
| C | -0.72837200 | -0.38067500 | -0.00386700 |
| C | -1.42136800 | 0.86389100  | -0.00251400 |
| C | -0.67865900 | 2.09076500  | 0.00419900  |
| C | -2.83464800 | 0.87628100  | -0.00780800 |
| H | -3.34604100 | 1.83336600  | -0.00668700 |
| C | -3.55699600 | -0.29779200 | -0.01427900 |
| C | -2.87864100 | -1.52905500 | -0.01563800 |
| C | -1.49815500 | -1.56592700 | -0.01054300 |
| H | 1.22883300  | 3.02590700  | 0.01438300  |
| H | 4.64080100  | -0.27402000 | 0.01671900  |
| H | 3.34599600  | 1.83336200  | 0.01856900  |
| H | 1.00620200  | -2.52988300 | -0.00419400 |
| H | 3.44115300  | -2.45596900 | 0.00522400  |
| H | -1.22890500 | 3.02590900  | 0.00510100  |
| H | -4.64079700 | -0.27401500 | -0.01829500 |
| H | -3.44109900 | -2.45596500 | -0.02071100 |
| H | -1.00614700 | -2.52988300 | -0.01174700 |

E= -539.6684853 a.u.

Supplementary Information File for Physical Chemistry Chemical Physics

**Triphenylene**

|   |             |             |             |
|---|-------------|-------------|-------------|
| C | 0.40430900  | -2.72306100 | -0.01719500 |
| C | 1.05512700  | -1.47001700 | -0.01176000 |
| C | 0.29972700  | -0.21367600 | -0.01135900 |
| C | -1.11219400 | -0.20089900 | -0.01636300 |
| C | 2.47340000  | -1.44484200 | -0.00658100 |
| C | 0.98703900  | 1.02718400  | -0.00582100 |
| C | 2.45274700  | 1.05319300  | -0.00059800 |
| C | 3.18370300  | -0.16249100 | -0.00094000 |
| C | 3.16977200  | 2.26955300  | 0.00482300  |
| C | 0.22725700  | 2.21734000  | -0.00550300 |
| C | -1.15359000 | 2.20201200  | -0.01044800 |
| C | -1.83167600 | 0.97780400  | -0.01596200 |
| H | -2.91540000 | 0.95077400  | -0.01989200 |
| H | -1.70553000 | 3.13505400  | -0.01004100 |
| C | 1.10798900  | -3.91126800 | -0.01755300 |
| C | 2.50723100  | -3.88643300 | -0.01240700 |
| C | 3.16829100  | -2.67401000 | -0.00705200 |
| H | 0.57591100  | -4.85576800 | -0.02179800 |
| H | 3.07249700  | -4.81146300 | -0.01260800 |
| C | 4.59427800  | -0.09957900 | 0.00420400  |
| C | 4.55029000  | 2.30328500  | 0.00978400  |
| H | 5.06873700  | 3.25533600  | 0.01387100  |
| C | 5.27143700  | 1.10392400  | 0.00948300  |
| H | 6.35543800  | 1.11537900  | 0.01334300  |
| H | -1.66036200 | -1.13260400 | -0.02065700 |
| H | -0.67566500 | -2.77033100 | -0.02122700 |
| H | 4.24926200  | -2.68294500 | -0.00314800 |
| H | 5.17521600  | -1.01122500 | 0.00406400  |
| H | 2.63698700  | 3.21014300  | 0.00514500  |
| H | 0.72625700  | 3.17628900  | -0.00128400 |

**E= -693.3446763 a.u.**

Supplementary Information File for Physical Chemistry Chemical Physics

**Table S2.** Optimized geometries of charged PAHs at B3LYP/6-311++G(d,p) level of theory.

**Benzene<sup>2+</sup> (singlet state)**

|   |             |             |             |
|---|-------------|-------------|-------------|
| C | 1.39425100  | 0.55282900  | -0.27677000 |
| C | 1.09286700  | -0.77366600 | 0.01766100  |
| C | 0.26640300  | 1.31117900  | 0.02319400  |
| C | -0.26548500 | -1.31201400 | -0.02319400 |
| C | -1.39333500 | -0.55366500 | 0.27677300  |
| C | -1.09195000 | 0.77282800  | -0.01766100 |
| H | 0.39487200  | 2.32273400  | 0.43335400  |
| H | -0.39395900 | -2.32356800 | -0.43335600 |
| H | 2.40405100  | 0.95311100  | -0.27289700 |
| H | 1.88025800  | -1.42434900 | 0.42337700  |
| H | -1.87934000 | 1.42351000  | -0.42338000 |
| H | -2.40313300 | -0.95395000 | 0.27289900  |

**E= -231.4099416 a.u.**

**Benzene<sup>2+</sup> (triplet state)**

|   |             |             |             |
|---|-------------|-------------|-------------|
| C | 1.32546600  | 0.52491800  | -0.03693700 |
| C | 1.11784100  | -0.88538700 | 0.03533500  |
| C | 0.20810800  | 1.40959100  | 0.04157500  |
| C | -0.20719100 | -1.41042800 | -0.04157500 |
| C | -1.32455000 | -0.52575500 | 0.03693700  |
| C | -1.11692400 | 0.88455000  | -0.03533500 |
| H | 0.36613300  | 2.48228000  | 0.15317400  |
| H | -0.36521700 | -2.48311700 | -0.15317400 |
| H | 2.33366300  | 0.92485900  | -0.14499400 |
| H | 1.96809400  | -1.55898900 | 0.14219100  |
| H | -1.96717800 | 1.55815200  | -0.14219200 |
| H | -2.33274600 | -0.92569500 | 0.14499500  |

**E= -231.4136397 a.u.**

Supplementary Information File for Physical Chemistry Chemical Physics

Naphtalene2+ (singlet state)

|   |             |             |             |
|---|-------------|-------------|-------------|
| C | 2.47440500  | 0.68940500  | 0.00833300  |
| C | 2.47631500  | -0.68321800 | 0.01580800  |
| C | 1.22691800  | 1.40400100  | -0.00164500 |
| C | 1.23082100  | -1.40134900 | 0.01363000  |
| C | 0.00112700  | -0.71553700 | 0.00389300  |
| C | -0.00086300 | 0.71470500  | -0.00389300 |
| C | -1.23055600 | 1.40051600  | -0.01363000 |
| H | -1.24851200 | 2.48769400  | -0.01962800 |
| C | -2.47605100 | 0.68238500  | -0.01580900 |
| C | -2.47414100 | -0.69023800 | -0.00833200 |
| C | -1.22665400 | -1.40483300 | 0.00164500  |
| H | 1.24184800  | 2.49122600  | -0.00748300 |
| H | 1.24877600  | -2.48852700 | 0.01962800  |
| H | -1.24158400 | -2.49205800 | 0.00748200  |
| H | -3.40737700 | 1.23887800  | -0.02338400 |
| H | -3.40391500 | -1.24936900 | -0.00983000 |
| H | 3.40418000  | 1.24853700  | 0.00983200  |
| H | 3.40764100  | -1.23971100 | 0.02338300  |

E= -385.2127427 a.u.

Naphtalene<sup>2+</sup> (triplet state)

|   |             |             |             |
|---|-------------|-------------|-------------|
| C | 2.43679900  | 0.71923200  | 0.00807200  |
| C | 2.43879200  | -0.71315400 | 0.01591200  |
| C | 1.22988200  | 1.43004500  | -0.00176100 |
| C | 1.23385600  | -1.42738500 | 0.01387800  |
| C | 0.00115900  | -0.73848200 | 0.00403800  |
| C | -0.00089400 | 0.73764900  | -0.00404000 |
| C | -1.23359200 | 1.42655300  | -0.01387900 |
| H | -1.24843600 | 2.51200500  | -0.01988800 |
| C | -2.43852700 | 0.71232200  | -0.01591000 |
| C | -2.43653500 | -0.72006500 | -0.00807100 |
| C | -1.22961800 | -1.43087700 | 0.00176000  |
| H | 1.24170800  | 2.51553500  | -0.00763700 |
| H | 1.24870000  | -2.51283800 | 0.01988400  |
| H | -1.24144400 | -2.51636700 | 0.00763600  |
| H | -3.38567800 | 1.24342700  | -0.02347700 |
| H | -3.38220500 | -1.25385300 | -0.00981100 |
| H | 3.38246900  | 1.25302100  | 0.00981200  |
| H | 3.38594200  | -1.24425900 | 0.02348400  |

E= -385.1956228 a.u.

## Supplementary Information File for Physical Chemistry Chemical Physics

### Anthracene<sup>2+</sup> (singlet state)

|   |             |             |             |
|---|-------------|-------------|-------------|
| C | -3.67857400 | 0.69151700  | 0.00248700  |
| C | -2.45817200 | 1.40531000  | -0.00034400 |
| C | -1.23400800 | 0.71873200  | -0.00122900 |
| C | -1.23326800 | -0.71979600 | 0.00077500  |
| C | -2.45672300 | -1.40762900 | 0.00357500  |
| C | -0.00103500 | 1.40915700  | -0.00404600 |
| C | 0.00041700  | -1.40895600 | -0.00012100 |
| C | 1.23339100  | -0.71853100 | -0.00293800 |
| C | 1.23265000  | 0.71999700  | -0.00494200 |
| C | 2.45610600  | 1.40783000  | -0.00774200 |
| H | 2.46992500  | 2.49300400  | -0.00927400 |
| C | 3.67724200  | 0.69528800  | -0.00858500 |
| C | 3.67795600  | -0.69131600 | -0.00665300 |
| C | 2.45755500  | -1.40511000 | -0.00382300 |
| H | -0.00159400 | 2.49597000  | -0.00556000 |
| H | -2.47310700 | 2.49046900  | -0.00183300 |
| H | -2.47054200 | -2.49280300 | 0.00510800  |
| H | 0.00097600  | -2.49577000 | 0.00139300  |
| H | 2.47249000  | -2.49026900 | -0.00233400 |
| C | -3.67786000 | -0.69508700 | 0.00441900  |
| H | 4.61356500  | 1.24172900  | -0.01075500 |
| H | 4.61484200  | -1.23679700 | -0.00730000 |
| H | -4.61545900 | 1.23699700  | 0.00313400  |
| H | -4.61418300 | -1.24152800 | 0.00658800  |

E= -538.9684006 a.u.

### Anthracene<sup>2+</sup> (triplet state)

|   |             |             |             |
|---|-------------|-------------|-------------|
| C | -3.67667700 | 0.67977000  | 0.00251900  |
| C | -2.46305500 | 1.41193100  | -0.00025400 |
| C | -1.22631900 | 0.74783700  | -0.00123100 |
| C | -1.22064300 | -0.70142600 | 0.00066300  |
| C | -2.48329800 | -1.41526800 | 0.00348600  |
| C | -0.00105100 | 1.44227700  | -0.00397400 |
| C | 0.00040800  | -1.39336300 | -0.00025300 |
| C | 1.22074700  | -0.70017400 | -0.00298700 |
| C | 1.22493100  | 0.74909300  | -0.00489700 |
| C | 2.46098300  | 1.41445500  | -0.00762000 |
| H | 2.49556400  | 2.49893000  | -0.00909600 |
| C | 3.67535800  | 0.68353800  | -0.00847800 |
| C | 3.67787500  | -0.72821200 | -0.00662700 |
| C | 2.48413600  | -1.41272300 | -0.00394000 |
| H | -0.00160900 | 2.52754700  | -0.00539800 |
| H | -2.49875100 | 2.49637000  | -0.00162400 |
| H | -2.46939200 | -2.50002200 | 0.00488700  |
| H | 0.00096600  | -2.47844800 | 0.00117100  |
| H | 2.47134600  | -2.49749000 | -0.00249500 |
| C | -3.67774100 | -0.73198200 | 0.00437300  |
| H | 4.61598600  | 1.22452700  | -0.01059600 |
| H | 4.61925200  | -1.26490800 | -0.00733000 |
| H | -4.61786100 | 1.21979400  | 0.00321700  |
| H | -4.61856500 | -1.26964200 | 0.00648300  |

E= -538.9320275 a.u.



Supplementary Information File for Physical Chemistry Chemical Physics

Phenanthrene<sup>2+</sup> (singlet state)

|   |             |             |             |
|---|-------------|-------------|-------------|
| C | 3.61848100  | -0.27021000 | 0.01287400  |
| C | 2.88286100  | 0.89393100  | 0.01378400  |
| C | 1.43528200  | 0.85033000  | 0.00820300  |
| C | 0.73768300  | -0.42050000 | 0.00153800  |
| C | 1.50782400  | -1.56365100 | 0.00085200  |
| C | 2.93258200  | -1.48956900 | 0.00645100  |
| C | 0.72230300  | 2.02783700  | 0.00931500  |
| C | -0.73767600 | -0.42049900 | -0.00403900 |
| C | -1.43530400 | 0.85033100  | -0.00253200 |
| C | -0.72235300 | 2.02783700  | 0.00392700  |
| C | -2.88288400 | 0.89393300  | -0.00784600 |
| H | -3.37298800 | 1.86212500  | -0.00652200 |
| C | -3.61847700 | -0.27020600 | -0.01444600 |
| C | -2.93254900 | -1.48956500 | -0.01586000 |
| C | -1.50779000 | -1.56364900 | -0.01071900 |
| H | 1.23808200  | 2.98330400  | 0.01431000  |
| H | 4.70129500  | -0.24818600 | 0.01701600  |
| H | 3.37294300  | 1.86212200  | 0.01868800  |
| H | 1.06150900  | -2.54980300 | -0.00391200 |
| H | 3.49421600  | -2.41873500 | 0.00564100  |
| H | -1.23815400 | 2.98330500  | 0.00506800  |
| H | -4.70129200 | -0.24818100 | -0.01846200 |
| H | -3.49416200 | -2.41873000 | -0.02103200 |
| H | -1.06145200 | -2.54980000 | -0.01229600 |

E= -538.9422349 a.u.

Phenanthrene<sup>2+</sup> (triplet state)

|   |             |             |             |
|---|-------------|-------------|-------------|
| C | 3.56314000  | -0.31287000 | 0.01255600  |
| C | 2.82971000  | 0.89143700  | 0.01364700  |
| C | 1.41699100  | 0.88462700  | 0.00828300  |
| C | 0.71272400  | -0.37895000 | 0.00157100  |
| C | 1.49548900  | -1.57579900 | 0.00069200  |
| C | 2.89179400  | -1.53652500 | 0.00609200  |
| C | 0.70012900  | 2.09718600  | 0.00946000  |
| C | -0.71271800 | -0.37894900 | -0.00381300 |
| C | -1.41701400 | 0.88462800  | -0.00243200 |
| C | -0.70018000 | 2.09718600  | 0.00416300  |
| C | -2.82973300 | 0.89144000  | -0.00775400 |
| H | -3.35761100 | 1.83958400  | -0.00671700 |
| C | -3.56313500 | -0.31286600 | -0.01438600 |
| C | -2.89176100 | -1.53652200 | -0.01575900 |
| C | -1.49545500 | -1.57579800 | -0.01060000 |
| H | 1.23724100  | 3.03971700  | 0.01451400  |
| H | 4.64711000  | -0.28165700 | 0.01675300  |
| H | 3.35756700  | 1.83958100  | 0.01868700  |
| H | 1.01518600  | -2.54547000 | -0.00422900 |
| H | 3.45220600  | -2.46440500 | 0.00523400  |
| H | -1.23731400 | 3.03971900  | 0.00514800  |
| H | -4.64710600 | -0.28165200 | -0.01838900 |
| H | -3.45215200 | -2.46440100 | -0.02084600 |
| H | -1.01513000 | -2.54546900 | -0.01187500 |

E= -538.9388381 a.u.

Supplementary Information File for Physical Chemistry Chemical Physics

Triphenylene<sup>2+</sup> (singlet state)

|   |             |             |             |
|---|-------------|-------------|-------------|
| C | 0.37005400  | -2.70326600 | -0.10069300 |
| C | 1.01249400  | -1.43273000 | -0.04482600 |
| C | 0.28958800  | -0.21741200 | -0.04204300 |
| C | -1.15286000 | -0.21644900 | -0.05223600 |
| C | 2.51492000  | -1.40606200 | 0.02657100  |
| C | 0.98165800  | 1.04202300  | 0.00409700  |
| C | 2.45732300  | 1.06841300  | -0.01069000 |
| C | 3.19394800  | -0.16571100 | 0.02974800  |
| C | 3.16998300  | 2.25242700  | -0.07445400 |
| C | 0.22718100  | 2.19953500  | 0.07334200  |
| C | -1.18945300 | 2.16554700  | 0.06952500  |
| C | -1.87771900 | 0.95479700  | 0.00190000  |
| H | -2.96022800 | 0.93364200  | -0.00421500 |
| H | -1.73576200 | 3.10136800  | 0.11936200  |
| C | 1.08879000  | -3.86173600 | -0.06558400 |
| C | 2.52539800  | -3.83632000 | 0.03563800  |
| C | 3.20232100  | -2.65311600 | 0.07635200  |
| H | 0.58085600  | -4.81846800 | -0.11055300 |
| H | 3.06716900  | -4.77451400 | 0.07603000  |
| C | 4.63544200  | -0.11325000 | 0.04040700  |
| C | 4.58692300  | 2.26906500  | -0.07035800 |
| H | 5.09945700  | 3.22402500  | -0.11572700 |
| C | 5.31800000  | 1.08337600  | -0.00804200 |
| H | 6.40057300  | 1.10087800  | -0.00163000 |
| H | -1.69410100 | -1.14998000 | -0.09687600 |
| H | -0.70450400 | -2.76923100 | -0.17230600 |
| H | 4.27856000  | -2.68104100 | 0.14765100  |
| H | 5.20970200  | -1.02703500 | 0.08094200  |
| H | 2.66571800  | 3.20682700  | -0.13674600 |
| H | 0.69705400  | 3.17105300  | 0.13993200  |

E= -692.6339039 a.u.

Supplementary Information File for Physical Chemistry Chemical Physics

**Triphenylene<sup>2+</sup> (triplet state)**

|   |             |             |             |
|---|-------------|-------------|-------------|
| C | 0.38622700  | -2.72178300 | -0.01731000 |
| C | 1.03552500  | -1.46623800 | -0.01185100 |
| C | 0.29388300  | -0.23277100 | -0.01144800 |
| C | -1.11953100 | -0.21746700 | -0.01648800 |
| C | 2.49284400  | -1.44036400 | -0.00651900 |
| C | 1.00011900  | 1.04224300  | -0.00570900 |
| C | 2.43911900  | 1.06777300  | -0.00060500 |
| C | 3.19019600  | -0.18136500 | -0.00094400 |
| C | 3.15907700  | 2.28419000  | 0.00480400  |
| C | 0.23741600  | 2.23236400  | -0.00533700 |
| C | -1.14799500 | 2.20514200  | -0.01034300 |
| C | -1.83133600 | 0.97144600  | -0.01598600 |
| H | -2.91501100 | 0.95243900  | -0.01992300 |
| H | -1.70671000 | 3.13388700  | -0.00992500 |
| C | 1.10252000  | -3.90799400 | -0.01763800 |
| C | 2.51261000  | -3.88296400 | -0.01244900 |
| C | 3.18632500  | -2.67209300 | -0.00702700 |
| H | 0.57755500  | -4.85621600 | -0.02188600 |
| H | 3.07090400  | -4.81196300 | -0.01270300 |
| C | 4.60218600  | -0.11588000 | 0.00426500  |
| C | 4.54459500  | 2.30619300  | 0.00978500  |
| H | 5.06995600  | 3.25419500  | 0.01387700  |
| C | 5.27132400  | 1.09754900  | 0.00953700  |
| H | 6.35499100  | 1.11701400  | 0.01345600  |
| H | -1.67985200 | -1.14060400 | -0.02086900 |
| H | -0.69187700 | -2.78378600 | -0.02137200 |
| H | 4.26595200  | -2.69580700 | -0.00317000 |
| H | 5.19495600  | -1.01853800 | 0.00423400  |
| H | 2.63977300  | 3.23101200  | 0.00514600  |
| H | 0.72274700  | 3.19704700  | -0.00108300 |

**E= -692.6384981 a.u.**
